# Supplementary material for: Upconversion luminescence with tunable lifetime in NaYF4:Yb,Er nanocrystals: role of nanocrystal size
Source: Royal Society of Chemistry journal article supplement (doi:10.1039/c2nr32482b), 2012-11-12
Supplement: c2nr32482b.pdf [file c2nr32482b.pdf]

## Supporting Information

# Upconversion Luminescence with Tunable Lifetime in NaYF<sub>4</sub>:Yb,Er Nanocrystals: Role of Nanocrystal Size

*Jiangbo Zhao<sup>a</sup>, Zhenda Lu<sup>b</sup>, Yadong Yin<sup>b</sup>, Christopher McRae<sup>c</sup>, James A. Piper<sup>a</sup>, Judith M. Dawes<sup>a</sup>,  
Dayong Jin<sup>a\*</sup>, and Ewa M. Goldys<sup>a\*</sup>*

\* To whom correspondence should be addressed. E-mail: [dayong.jin@mq.edu.au](mailto:dayong.jin@mq.edu.au),  
[ewa.goldys@mq.edu.au](mailto:ewa.goldys@mq.edu.au).

<sup>a</sup> MQ BioFocus Centre, Faculty of Science, Macquarie University, NSW 2109, Sydney, Australia

<sup>b</sup> Department of Chemistry, University of California, Riverside, CA 92521, USA

<sup>c</sup> Department of Chemistry and Biomolecular Sciences, Faculty of Science, Macquarie University,  
NSW 2109, Sydney, Australia

### Contents:

1. Figure S1 (size histograms)
2. Figure S2 (upconversion power-dependence gradients)
3. Figure S3 (upconversion luminescence decay of ~31nm nanocrystals in dried state and organic solvent)
4. Rate Equations for Yb,Er-doped Nanocrystals and the Asymptotic Solutions

-S2-

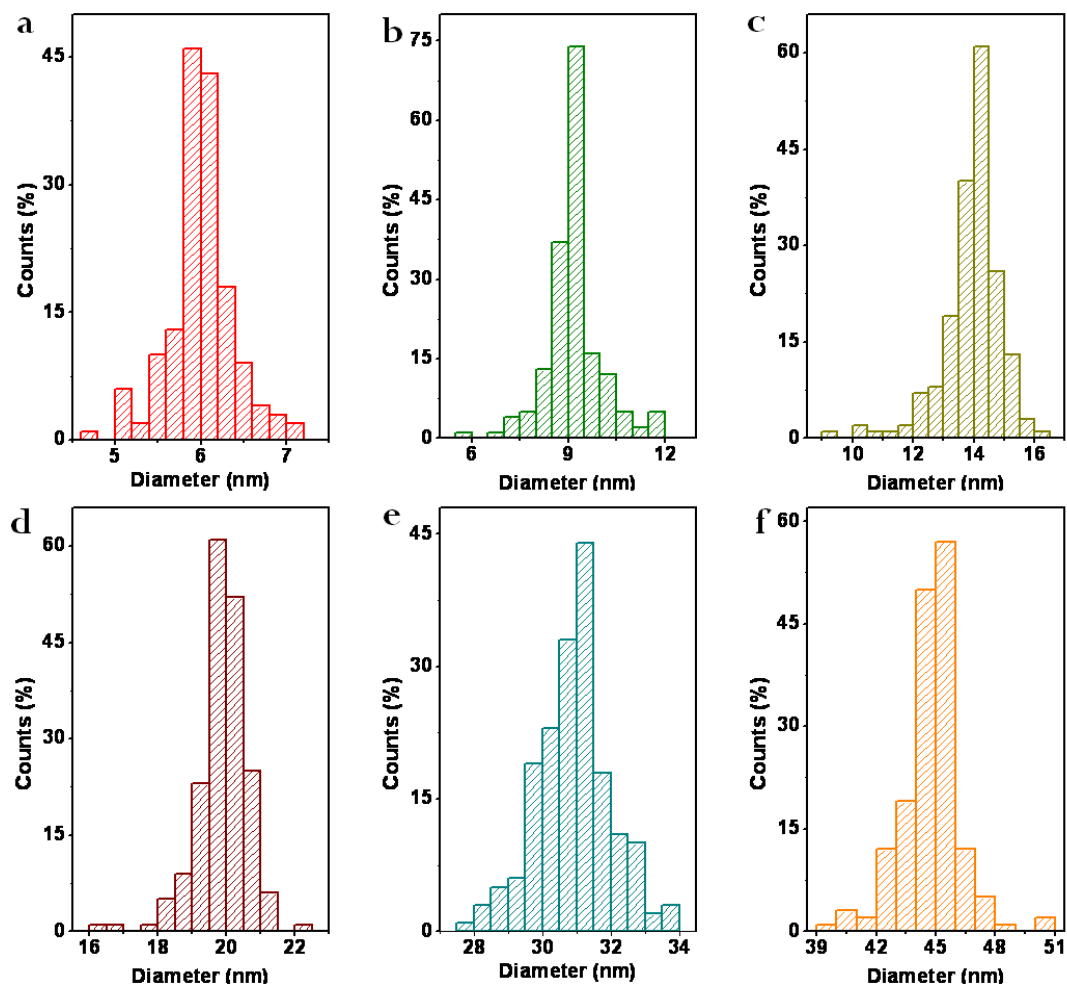

**Fig. S1. (a-f) The particle size distribution histograms corresponding to TEM images in Figure 1. Histograms of the particle sizes are drawn from analysis of > 150 particles for each sample. The mean and standard deviation for each nanocrystalline size are, respectively,  $5.99 \pm 0.38$  nm in **a**;  $9.20 \pm 0.85$  nm in **b**;  $13.94 \pm 0.97$  nm in **c**;  $19.89 \pm 0.76$  nm in **d**;  $30.90 \pm 1.11$  nm in **e**;  $44.81 \pm 1.54$  nm in **f** only measuring top/bottom surface area.**

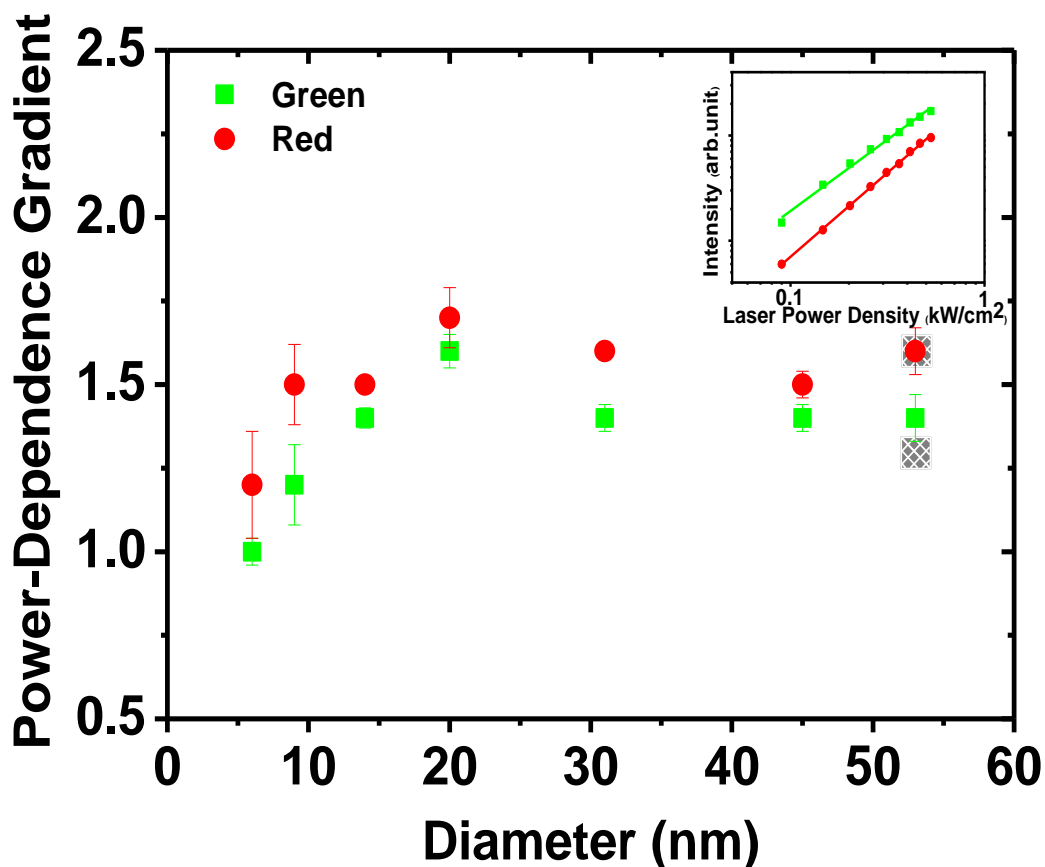

**Fig. S2. Gradients for power dependence of the green and red upconverted luminescence of NaYF<sub>4</sub> nanocrystals with various sizes from 6 nm to 45 nm.** The log-log plots of upconversion intensities versus NIR excitation power were fitted to straight lines, and the gradients of these lines have been plotted for green and red luminescence. One selected example plot is shown in the corresponding inset, indicating the upconversion emission intensities of the green and red emission versus NIR excitation laser power density. ☒ symbols represent silica-coated nanoparticles.

-S4-

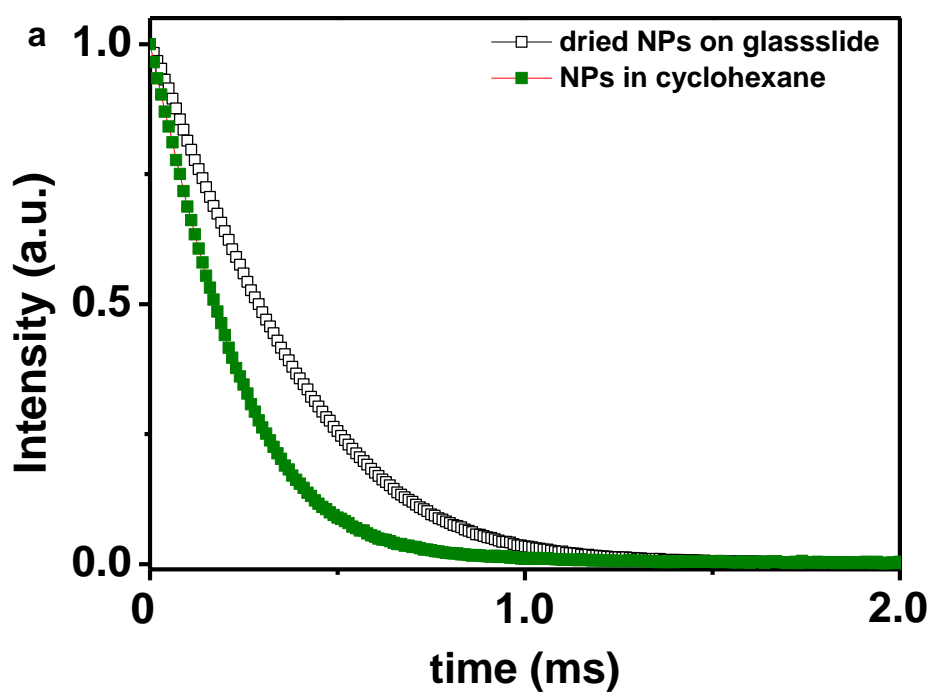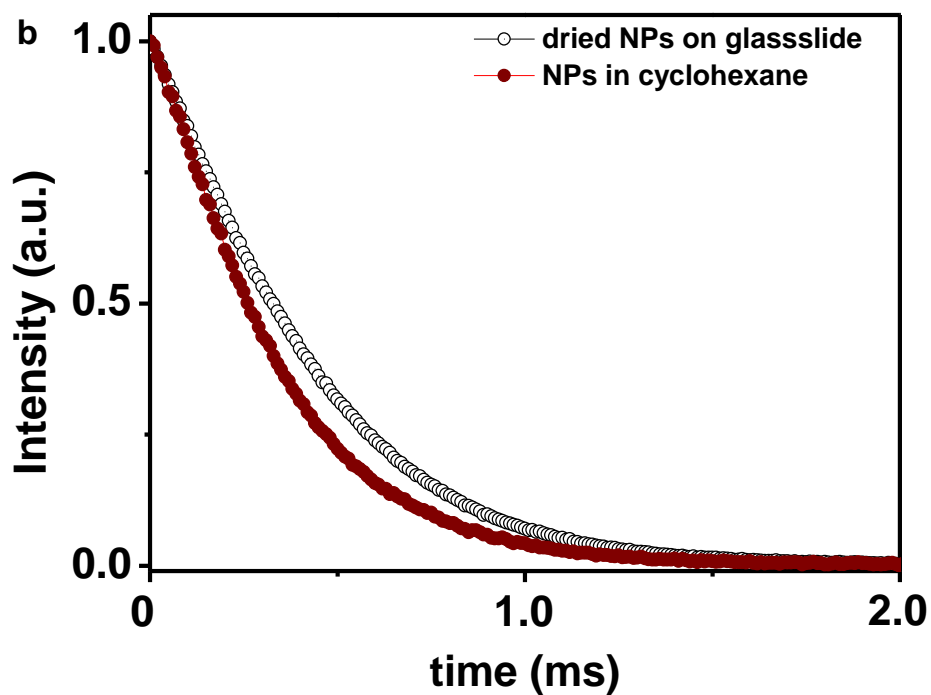

**Fig. S3. Normalized upconversion fluorescence decays for ~31 nm nanocrystals in dried state and organic solvent cyclohexane: green emission (a) and red emission (b), respectively. All the measurements were obtained at an excitation wavelength of 980 nm.**

-S5-

## RATE EQUATIONS FOR ER:YB UNPCONVERTING NANOPARTICLES AND ASYMPTOTIC BEHAVIOUR OF THE SOLUTIONS

### 1. RATE EQUATIONS FOR AN ARBITRARY EXCITATION

$$\begin{aligned}\frac{dN_{Yb,2}}{dt} &= -k_{FT}N_{Er}N_{Yb,2} - k_{c2}N_{Er,2}N_{Yb,2} - k_{c3}N_{Er,3}N_{Yb,2} \\ \frac{dN_{Er,2}}{dt} &= -k_{c2}N_{Er,2}N_{Yb,2} - W_2N_{Er,2} + W_{32}N_{Er,3} + W_{52}N_{Er,5} + W_{62}N_{Er,6} \\ \frac{dN_{Er,3}}{dt} &= k_{FT}N_{Er}N_{Yb,2} - k_{c3}N_{Er,3}N_{Yb,2} - W_3N_{Er,3} + W_{53}N_{Er,5} + W_{63}N_{Er,6} \\ \frac{dN_{Er,5}}{dt} &= k_{c2}N_{Er,2}N_{Yb,2} - W_5N_{Er,5} + W_{65}N_{Er,6} \\ \frac{dN_{Er,6}}{dt} &= k_{c3}N_{Er,3}N_{Yb,2} - W_6N_{Er,6}\end{aligned}$$

The rate equations for the upconverting NaYF<sub>4</sub> doped with Er and Yb are:

$$(1.1) \quad \frac{dN_{Yb,2}}{dt} = \rho_p \sigma_{Yb} N_{Yb} - k_{FT} N_{Er,1} N_{Yb,2} - k_{c2} N_{Er,2} N_{Yb,2} - k_{c3} N_{Er,3} N_{Yb,2}$$

$$(1.2) \quad \frac{dN_{Er,2}}{dt} = -k_{c2} N_{Er,2} N_{Yb,2} - \rho_p \sigma_{ESA2} N_{Er,2} - W_2 N_{Er,2} + W_{32} N_{Er,3} + W_{52} N_{Er,5} + W_{62} N_{Er,6}$$

$$(1.3) \quad \frac{dN_{Er,3}}{dt} = k_{FT} N_{Er,1} N_{Yb,2} - \rho_p \sigma_{ESA3} N_{Er,3} - k_{c3} N_{Er,3} N_{Yb,2} - W_3 N_{Er,3} + W_{53} N_{Er,5} + W_{63} N_{Er,6}$$

$$(1.4) \quad \frac{dN_{Er,5}}{dt} = k_{c2} N_{Er,2} N_{Yb,2} + \rho_p \sigma_{ESA2} N_{Er,2} - W_5 N_{Er,5} + W_{65} N_{Er,6}$$

$$(1.5) \quad \frac{dN_{Er,6}}{dt} = k_{c3} N_{Er,3} N_{Yb,2} + \rho_p \sigma_{ESA3} N_{Er,3} - W_6 N_{Er,6}$$

Here,  $N_{Er(Yb),i}$  denotes the population of level  $i$  of Er(Yb).  $W_i$  denotes total radiative and nonradiative decay rate of the relevant population, while  $W_{ij}$  is the decay rate of population of level  $i$  decaying into  $j$ .  $\sigma_{Yb}$  is the absorption cross section of ground state Yb, while  $\sigma_{ESA2(3)}$  refers to absorption cross section of Er in level 2(3) at 980 nm.  $k_{FT}$  is the coefficient of forward energy transfer, while  $k_{c2(3)}$  is the cooperative upconversion coefficient for the 2→5 and 3→6 upconversion.  $\rho_p$  is the power constant defined as excitation power variable. See main body of the paper for justification of these equations and underlying assumptions.

-S6-

## 2. RATE EQUATIONS FOR PULSED EXCITATION, BETWEEN THE PULSES

In the case of pulsed excitation, after the excitation has ceased (at  $t = 0$ ), these equations assume a simpler form:

$$(2.1) \quad \frac{dN_{Yb,2}}{dt} = -k_{FT}N_{Er}N_{Yb,2} - k_{c2}N_{Er,2}N_{Yb,2} - k_{c3}N_{Er,3}N_{Yb,2}$$

$$(2.2) \quad \frac{dN_{Er,2}}{dt} = -k_{c2}N_{Er,2}N_{Yb,2} - W_2N_{Er,2} + W_{32}N_{Er,3} + W_{52}N_{Er,5} + W_{62}N_{Er,6}$$

$$(2.3) \quad \frac{dN_{Er,3}}{dt} = k_{FT}N_{Er}N_{Yb,2} - k_{c3}N_{Er,3}N_{Yb,2} - W_3N_{Er,3} + W_{53}N_{Er,5} + W_{63}N_{Er,6}$$

$$(2.4) \quad \frac{dN_{Er,5}}{dt} = k_{c2}N_{Er,2}N_{Yb,2} - W_5N_{Er,5} + W_{65}N_{Er,6}$$

$$(2.5) \quad \frac{dN_{Er,6}}{dt} = k_{c3}N_{Er,3}N_{Yb,2} - W_6N_{Er,6}$$

Here,  $N_{Er,1}$  is approximated by  $N_{Er} = \text{const}$ , the density of Er ions.

## 3. ASYMPTOTIC BEHAVIOUR OF THE SOLUTIONS

We now establish the asymptotic behaviour of the solutions. This is done in several steps.

### 1. Positivity of the solutions

It is easy to show that if the initial conditions are all positive then solutions stay positive for all times.

### 2. Upper bound of the solution for $N_{Yb,2}$

First we find the upper bound for  $N_{Yb,2}$ . It satisfies the equation:

$$(3.1) \quad \frac{dN_{Yb,2}}{dt} = -k_{FT}N_{Er}N_{Yb,2} - k_{c2}N_{Er,2}N_{Yb,2} - k_{c3}N_{Er,3}N_{Yb,2}$$

Clearly, by 1. we have

$$(3.2) \quad \frac{dN_{Yb,2}}{dt} \leq -k_{FT}N_{Er}N_{Yb,2}$$

Solving this inequality we obtain

$$(3.3) \quad N_{Yb,2}(t) \leq e^{-k_{FT}N_{Er}t}N_{Yb,2}(0)$$

### 3. Upper bounds of the solution for $N_{Er,2} - N_{Er,6}$

-S7-

We now consider equations for  $N_{Er,2}$ ,  $N_{Er,3}$ ,  $N_{Er,5}$  and  $N_{Er,6}$

$$(3.4) \quad \frac{dN_{Er,2}}{dt} = -(k_{c2}N_{Yb,2} + W_2) N_{Er,2} + W_{32}N_{Er,3} + W_{52}N_{Er,5} + W_{62}N_{Er,6},$$

$$(3.5) \quad \frac{dN_{Er,3}}{dt} = -(k_{c3}N_{Yb,2} + W_3) N_{Er,3} + W_{53}N_{Er,5} + W_{63}N_{Er,6} + k_{FT}N_{Er}N_{Yb,2},$$

$$(3.6) \quad \frac{dN_{Er,5}}{dt} = -W_5N_{Er,5} + W_{65}N_{Er,6} + k_{c2}N_{Er,2}N_{Yb,2},$$

$$(3.7) \quad \frac{dN_{Er,6}}{dt} = -W_6N_{Er,6} + k_{c3}N_{Er,3}N_{Yb,2}.$$

Clearly

$$(3.8) \quad \frac{dN_{Er,2}}{dt} < -W_2N_{Er,2} + W_{32}N_{Er,3} + W_{52}N_{Er,5} + W_{62}N_{Er,6}$$

AND

$$(3.9) \quad \frac{dN_{Er,3}}{dt} < -W_3N_{Er,3} + W_{53}N_{Er,5} + W_{63}N_{Er,6} + k_{FT}N_{Er}N_{Yb,2}$$

By point 2. for every  $\epsilon > 0$  we can choose  $t_0 = t_0(\epsilon, N_{Yb,2}(0), k_{FT}N_{Er})$ , such that for all  $t \geq t_0$  we have  $N_{Yb,2}(t) < \frac{\epsilon}{k_{c2}}$  AND  $N_{Yb,2}(t) < \frac{\epsilon}{k_{c3}}$ .

Then, for  $t \geq t_0$  we have

$$(3.10) \quad \frac{dN_{Er,2}}{dt} < -W_2N_{Er,2} + W_{32}N_{Er,3} + W_{52}N_{Er,5} + W_{62}N_{Er,6}$$

$$(3.11) \quad \frac{dN_{Er,3}}{dt} < -W_3N_{Er,3} + W_{53}N_{Er,5} + W_{63}N_{Er,6} + k_{FT}N_{Er}N_{Yb,2}$$

$$(3.12) \quad \frac{dN_{Er,5}}{dt} < -W_5N_{Er,5} + W_{65}N_{Er,6} + \epsilon N_{Er,2}$$

$$(3.13) \quad \frac{dN_{Er,6}}{dt} < -W_6N_{Er,6} + \epsilon N_{Er,3}$$

Now, for a given  $A, B, C > 0$  let

$$V_t = N_{Er,2} + AN_{Er,3} + BN_{Er,5} + CN_{Er,6}.$$

-S8-

For simplicity we denote  $f(t) = k_{FT}N_{Er}N_{Yb,2}$ . By taking the first derivative of  $V_t$  and using the equations for  $N_{Er,2}, \dots, N_{Er,6}$  we obtain:

$$\begin{aligned}
 (3.14) \quad \frac{dV}{dt} &= \frac{dN_{Er,2}}{dt} + A \frac{dN_{Er,3}}{dt} + B \frac{dN_{Er,5}}{dt} + C \frac{dN_{Er,6}}{dt} \\
 &< -W_2N_{Er,2} + W_{32}N_{Er,3} + W_{52}N_{Er,5} + W_{62}N_{Er,6} \\
 &\quad - AW_3N_{Er,3} + AW_{53}N_{Er,5} + AW_{63}N_{Er,6} + Af(t) \\
 &\quad - BW_5N_{Er,5} + BW_{65}N_{Er,6} + B\epsilon N_{Er,2} \\
 &\quad - CW_6N_{Er,6} + C\epsilon N_{Er,3} \\
 &= -(W_2 - B\epsilon)N_{Er,2} - (AW_3 - W_{32} - C\epsilon)N_{Er,3} \\
 &\quad - (BW_5 - W_{52} - AW_{53})N_{Er,5} - (CW_6 - W_{62} - AW_{63} - BW_{65})N_{Er,6} + Af(t)
 \end{aligned}$$

Now we need to choose  $A, B, C$  and  $\epsilon$  in such a way that all the prefactors in brackets in front of  $N_{Er,2,3,5,6}$  are positive. So we need to ensure that, simultaneously

$$(3.15) \quad W_2 - B\epsilon > 0$$

$$(3.16) \quad AW_3 - W_{32} - C\epsilon > 0$$

$$(3.17) \quad BW_5 - W_{52} - AW_{53} > 0$$

$$(3.18) \quad CW_6 - W_{62} - AW_{63} - BW_{65} > 0$$

This is easily achievable. We choose  $A = 1$ . Then we take Equation 3.17 and choose a sufficiently large  $B$ , so that the left hand side becomes positive, this is always possible. With this choice of  $B$  and the previously chosen  $A = 1$  we take Equation 3.18 and choose  $C$  that is large enough to make the left hand side positive. Now we return to Equation 3.16. We note that for our choice of  $A = 1$  the value of  $AW_3 - W_{32} = W_3 - W_{32}$  is always positive, on the basis of physical argument that  $W_3 = W_{31} + W_{32}$ . In order to satisfy the inequality 3.16 it is enough to choose a sufficiently small  $\epsilon$  so that, for our previously chosen  $C$  the term  $C\epsilon$  is still smaller than  $W_3 - W_{32}$ . Finally we check whether the  $\epsilon$  found in this way will satisfy Equation 3.15; if it does not we choose an even smaller  $\epsilon$  that would satisfy 3.15, for example less than  $W_2/B$ , and it would obviously also satisfy Equation 3.16. Similar arguments are used to satisfy 3.17 and 3.18.

Now we reformulate Equation 3.14 so that we can see the form of  $V_t$  on the right hand side.

$$\begin{aligned}
 (3.19) \quad \frac{dV}{dt} &< -(W_2 - B\epsilon)N_{Er,2} - (AW_3 - W_{32} - C\epsilon)N_{Er,3} \\
 &\quad - (BW_5 - W_{52} - AW_{53})N_{Er,5} - (CW_6 - W_{62} - AW_{63} - BW_{65})N_{Er,6} + Af(t) \\
 &= -(W_2 - B\epsilon)N_{Er,2} - (W_3 - W_{32}/A - C\epsilon/A)AN_{Er,3} + Af(t) \\
 &\quad - (W_5 - W_{52}/B - AW_{53}/B)BN_{Er,5} - (W_6 - W_{62}/C - AW_{63}/C - BW_{65}/C)CN_{Er,6}
 \end{aligned}$$



-S9-

Now we choose  $\alpha$  to be the smallest of these prefactors in brackets, so  
 $\alpha = \min(W_2 - B\epsilon, W_3 - W_{32}/A - C\epsilon/A, W_5 - W_{52}/B - AW_{53}/B, W_6 - W_{62}/C - AW_{63}/C - BW_{65}/C)$ .  
 We recall that  $A = 1$ , then, for  $t > t_0$  we have

$$(3.20) \quad \frac{dV}{dt} \leq -\alpha V_t + f(t)$$

Now we use the Gronwall Lemma which gives

$$(3.21) \quad V_t \leq e^{-\alpha(t-t_0)}V_{t_0} + \int_{t_0}^t e^{-\alpha(t-s)}f(s)ds$$

By point 2 above we have  $f(t) \leq De^{-k_{FT}N_{Er}t}$ , therefore

$$(3.22) \quad \begin{aligned} V_t &\leq e^{-\alpha(t-t_0)}V_{t_0} + De^{-\alpha t} \int_{t_0}^t e^{\alpha s - k_{FT}N_{Er}s} ds \\ &\leq e^{-\alpha(t-t_0)}V_{t_0} + \frac{D}{\alpha - k_{FT}N_{Er}} (e^{-k_{FT}N_{Er}t} - e^{-\alpha(t-t_0) - k_{FT}N_{Er}t_0}) \end{aligned}$$

We assumed here that the denominator  $\alpha - k_{FT}N_{Er}$  is nonzero, if it is then we should change  $\alpha$  slightly.

It follows that there exist positive constants  $M, \gamma > 0, \gamma = \min(\alpha, k_{FT}N_{Er})$  such that  $V_t \leq Me^{-\gamma t}$ . We immediately get that  $N_{Er,2}(t) \leq Me^{-\gamma t}$  and  $N_{Er,3}(t) \leq Me^{-\gamma t}$ . Also  $N_{Er,5} \leq M/Be^{-\gamma t}$  and  $N_{Er,6} \leq M/Ce^{-\gamma t}$ .

#### 4. Optimal decay rates for $N_{Yb,2}$ and $N_{Er,2} - N_{Er,6}$

Now we need to find optimal rates of decay for all functions  $N_{Er,2,3,5,6}$ . We start with  $N_{Yb,2}$ . From Equation 3.1 we get

$$(3.23) \quad N_{Yb,2}(t) = N_{Yb,2}(0)e^{-(k_{FT}N_{Er}t)} \times \exp \left[ - \int_0^t k_{c2}N_{Er,2}(s)ds - \int_0^t k_{c3}N_{Er,3}(s)ds \right]$$

However we have just proved that  $\int_0^\infty k_{c2}N_{Er,2}(s)ds < \infty$  and  $\int_0^\infty k_{c3}N_{Er,3}(s)ds < \infty$ . Therefore again

$$(3.24) \quad 0 < \lim_{t \rightarrow \infty} [e^{k_{FT}N_{Er}t}N_{Yb,2}(t)] < \infty$$

that is  $\gamma_0 = k_{FT}N_{Er}$  is the optimal rate of decay for  $N_{Yb,2}$

For Er we use the following expression for the solution of the first order differential equation

$$(3.25) \quad \frac{dy}{dt} = \alpha(t)y(t) + f(t)$$

It can be expressed using the function  $G(t, s)$  given by

$$(3.26) \quad G(t, s) = \exp \left( \int_s^t \alpha(u)du \right)$$

-S10-

The solution can be expressed as

$$(3.27) \quad y(t) = G(t, 0)y(0) + \int_0^t G(t, s)f(s)ds$$

For  $N_{Er,3}$  we obtain

$$(3.28) \quad \begin{aligned} N_{Er,3}(t) = & G(t, 0)N_{Er,3}(0) + \int_0^t G(t, s) (W_{53}N_{Er,5}(s) + W_{63}N_{Er,6}(s)) ds \\ & + \int_0^t G(t, s)k_{FT}N_{Er}N_{Yb,2}(s)ds \end{aligned}$$

where

$$(3.29) \quad G(t, s) = \exp \left[ -W_3(t-s) - k_{c3} \int_s^t N_{Yb,2}(u)du \right]$$

Since  $0 < \int_0^\infty N_{Yb,2}(u)du < \infty$  we have

$$(3.30) \quad C_1 e^{-W_3(t-s)} \leq G(t, s) \leq C_2 e^{-W_3(t-s)}$$

These considerations indicate that  $N_{Er,3}$  decays exponentially. This is because  $G(t, 0)N_{Er,3}(0)$  decays exponentially and there are two other terms that can, potentially make convergence worse. But we have already shown in point 3 that  $N_{Er,3}$  has an exponential upper bound. Hence these two terms can not destroy the exponential decay rate, we will see this in more detail in a moment.

We denote  $\gamma_0$  to be the decay rate for  $N_{Yb,2}$ ,  $\gamma_i$  the decay rate for  $N_{Er,i}$ ,  $i = 2, 3, 5, 6$ . Now we calculate  $\gamma_3$  the exact decay rate for  $N_{Er,3}$ . By using 3.28 we obtain

$$(3.31) \quad \begin{aligned} e^{\gamma_3 t} N_{Er,3}(t) \sim & e^{(\gamma_3 - W_3)t} N_{Er,3}(0) + e^{\gamma_3 t} \int_0^t W_{53} e^{-W_3(t-s)} N_{Er,5}(s) ds \\ & + e^{\gamma_3 t} \int_0^t W_{63} e^{-W_3(t-s)} N_{Er,6}(s) ds + e^{\gamma_3 t} \int_0^t k_{FT} N_{Er} e^{-W_3(t-s)} N_{Yb,2}(s) ds \end{aligned}$$

-S11-

Now we substitute the relevant exponential functions for  $N_{Yb,2}$ ,  $N_{Er,5}$  and  $N_{Er,6}$ . We carry out the integrations to obtain

$$\begin{aligned}
 e^{\gamma_3 t} N_{Er,3}(t) &\sim e^{(\gamma_3 - W_3)t} N_{Er,3}(0) + e^{(\gamma_3 - W_3)t} \int_0^t W_{53} e^{(W_3 - \gamma_5)s} ds \\
 &+ e^{(\gamma_3 - W_3)t} \int_0^t W_{63} e^{(W_3 - \gamma_6)s} ds + e^{(\gamma_3 - W_3)t} \int_0^t k_{FT} N_{Er} e^{(W_3 - \gamma_0)s} ds \\
 &= e^{(\gamma_3 - W_3)t} N_{Er,3}(0) \\
 (3.32) \quad &+ e^{(\gamma_3 - W_3)t} W_{53} \frac{1}{(W_3 - \gamma_5)} [e^{(W_3 - \gamma_5)t} - 1] \\
 &+ e^{(\gamma_3 - W_3)t} W_{63} \frac{1}{(W_3 - \gamma_6)} [e^{(W_3 - \gamma_6)t} - 1] \\
 &+ e^{(\gamma_3 - W_3)t} k_{FT} N_{Er} \frac{1}{(W_3 - \gamma_0)} [e^{(W_3 - \gamma_0)t} - 1]
 \end{aligned}$$

Now the terms on the right must not tend to infinity because  $\gamma_3$  is optimal; this gives the conditions that

$$\begin{aligned}
 (3.33) \quad &\gamma_3 \leq W_3 \\
 &\gamma_3 \leq \gamma_5 \\
 &\gamma_3 \leq \gamma_6 \\
 &\gamma_3 \leq \gamma_0
 \end{aligned}$$

Here,  $\gamma_3$  is, by definition, the largest number that satisfies this condition. In addition, because  $\gamma_3$  is optimal, at least one of the terms on the right must not tend to zero. Hence at least one of the above inequalities is, in fact, an equality.

By the same argument but using the rate equations for the  $N_{Er,2}$ ,  $N_{Er,5}$ ,  $N_{Er,6}$  we get:

$$\begin{aligned}
 (3.34) \quad &\gamma_2 \leq W_2 \\
 &\gamma_2 \leq \gamma_3 \\
 &\gamma_2 \leq \gamma_5 \\
 &\gamma_2 \leq \gamma_6
 \end{aligned}$$

and at least one of the above inequalities is an equality. We also obtain that

$$\begin{aligned}
 (3.35) \quad &\gamma_5 \leq W_5 \\
 &\gamma_5 \leq W_6 \\
 &\gamma_5 \leq \gamma_0 + \gamma_2
 \end{aligned}$$

where at least one of the above inequalities is an equality, and

$$\begin{aligned}
 (3.36) \quad &\gamma_6 \leq W_6 \\
 &\gamma_6 \leq \gamma_0 + \gamma_3
 \end{aligned}$$

where at least one of the above inequalities is an equality.

-S12-

From the equations 3.33, ..., 3.36 and noting that in each case above we have at least one equality we obtain that

$$\begin{aligned} \gamma_3 &= \min(W_3, \gamma_0, \gamma_5, \gamma_6) \\ \gamma_2 &= \min(W_2, \gamma_3, \gamma_5, \gamma_6) \\ \gamma_5 &= \min(W_5, W_6, \gamma_0 + \gamma_2) \\ \gamma_6 &= \min(W_6, \gamma_0 + \gamma_3) \end{aligned} \quad (3.37)$$

For  $W_6 > W_5$  we obtain:

$$\gamma_5 = \min(W_5, \gamma_0 + \gamma_2) \quad (3.38)$$

Therefore, taking into account 3.33 we find that

$$\begin{aligned} \gamma_3 &= \min(W_3, \gamma_0, W_5, \gamma_0 + \gamma_2, W_6, \gamma_0 + \gamma_3) \\ &= \min(W_3, \gamma_0) \end{aligned} \quad (3.39)$$

Similarly, taking into account 3.34 we obtain

$$\begin{aligned} \gamma_2 &= \min(W_2, W_3, \gamma_0, W_5, \gamma_0 + \gamma_2, W_6, \gamma_0 + \gamma_3) \\ &= \min(W_2, \gamma_0) \end{aligned} \quad (3.40)$$

After one more substitution we get

$$\gamma_5 = \min(W_5, W_2 + \gamma_0, 2\gamma_0) \quad (3.41)$$

$$\gamma_6 = \min(W_6, W_3 + \gamma_0, 2\gamma_0) \quad (3.42)$$

We recall that  $\gamma_0$  is the decay rate for Yb ions which can be higher than each of the rates within Er, because it is controlled by (arbitrarily high) Er concentration and the forward energy transfer coefficient. In this case we get that  $\gamma_6 = W_6$  and  $\gamma_5 = W_5$ . For low enough  $\gamma_0$ , the terms  $W_2 + \gamma_0$ ,  $W_3 + \gamma_0$  and  $2\gamma_0$  may become rate-limiting. In the case of  $W_6 < W_5$  we get

$$\gamma_5 = \min(W_6, W_2 + \gamma_0, 2\gamma_0) \quad (3.43)$$

$$\gamma_6 = \min(W_6, W_3 + \gamma_0, 2\gamma_0) \quad (3.44)$$

For high enough values of  $\gamma_0 = k_{FT}N_{Er}$  we obtain that  $\gamma_6 = \gamma_5$ , contrary to the experimental observations. This indicates that  $W_6 > W_5$ .
